# Supplementary material
Source: Springer Nature journal article supplement (https://www.springermedizin.de/resource/supplementary/12911_2010_389_MOESM4_ESM.pdf/9525626)
Supplement: MOESM4 [file 9525626]

**Enrollment**

Assessed for eligibility  
(n = 7,187)

Excluded (n = 1,730)  
Not meeting inclusion criteria  
(n = 1,730)

Randomized (n =5,457)

**Allocation**

Allocated to intervention group(s)  
Mailed report cards (n = 2,728)  
Printable report cards (n = 2,357)  
Enhanced provider report cards (n = 2,893)

Allocated to control group(s)  
(n = did not receive intervention)  
Mailed report cards (n = 2,729)  
Printable report cards (n = 3,100)  
Enhanced provider report cards (n=2,564)

**Follow up**

Lost to follow up  
Mailed report cards (n = 248; 240 faulty mail address/moved, 8 died/deemed non-diabetic)  
Printable report cards (n=7; died/deemed non-diabetic)  
Enhanced provider report cards (n=9;died/deemed non-diabetic)

Lost to follow up  
Mailed report cards (n = 9; died/deemed non-diabetic)  
Printable report cards (n=10; died/deemed non-diabetic)  
Enhanced provider report cards (n=8;died/deemed non-diabetic)

**Analysis**

Analyzed\*  
Mailed report cards (n = 2,728)  
Printable report cards (n = 2,357)  
Enhanced provider report cards (n = 2,893)  
  
\*Analyses were conducted according to intention-to-treat.

Analyzed  
Mailed report cards (n = 2,729)  
Printable report cards (n = 3,100)  
Enhanced provider report cards (n=2,564)
